# Supplementary material for: The NAMPT Inhibitor FK866 in Combination with Cisplatin Reduces Cholangiocarcinoma Cells Growth
Source: MDPI journal article supplement (doi:10.3390/cells12050775), 2023-02-28
Supplement: s1 [file s1]

## Patient Characteristics and NAMPT scoring

**Supp. Table S1**

|              | TMA Score ≤ 2.5<br>(N=44) | TMA Score > 2.5<br>(N=66) | Total (N=110) | p<br>value |
|--------------|---------------------------|---------------------------|---------------|------------|
| Age          |                           |                           |               | 0.500      |
| N            | 44                        | 66                        | 110           |            |
| Mean (SD)    | 61.0 (11.7)               | 62.7 (11.8)               | 62.0 (11.8)   |            |
| Median       | 62.5                      | 64.0                      | 63.5          |            |
| Range        | 35.0 - 78.0               | 28.0 - 86.0               | 28.0 - 86.0   |            |
| Gender       |                           |                           |               | 0.243      |
| Female       | 19 (43.2%)                | 36 (54.5%)                | 55 (50.0%)    |            |
| Male         | 25 (56.8%)                | 30 (45.5%)                | 55 (50.0%)    |            |
| Hepatitis..B |                           |                           |               | 0.766      |
| Missing      | 34                        | 43                        | 77            |            |
| 9            | 0 (0.0%)                  | 1 (4.3%)                  | 1 (3.0%)      |            |
| No           | 9 (90.0%)                 | 19 (82.6%)                | 28 (84.8%)    |            |
| Yes          | 1 (10.0%)                 | 3 (13.0%)                 | 4 (12.1%)     |            |
| Hepatitis..C |                           |                           |               | 0.798      |
| Missing      | 33                        | 40                        | 73            |            |
| 9            | 0 (0.0%)                  | 1 (3.8%)                  | 1 (2.7%)      |            |
| No           | 9 (81.8%)                 | 20 (76.9%)                | 29 (78.4%)    |            |
| Yes          | 2 (18.2%)                 | 5 (19.2%)                 | 7 (18.9%)     |            |
| PSC          |                           |                           |               | 0.283      |
| Missing      | 33                        | 45                        | 78            |            |
| No           | 7 (63.6%)                 | 17 (81.0%)                | 24 (75.0%)    |            |

|                         |             |             |              |       |
|-------------------------|-------------|-------------|--------------|-------|
| Yes                     | 4 (36.4%)   | 4 (19.0%)   | 8 (25.0%)    | 0.692 |
| Cirrhosis               |             |             |              |       |
| Missing                 | 33          | 43          | 76           |       |
| No                      | 9 (81.8%)   | 20 (87.0%)  | 29 (85.3%)   | 0.036 |
| Yes                     | 2 (18.2%)   | 3 (13.0%)   | 5 (14.7%)    |       |
| CCA..Classification     |             |             |              |       |
| Intrahepatic            | 44 (100.0%) | 66 (100.0%) | 110 (100.0%) | 0.087 |
| TNM.Stage...documented. |             |             |              |       |
| Missing                 | 7           | 11          | 18           |       |
| STAGE I                 | 14 (37.8%)  | 20 (36.4%)  | 34 (37.0%)   | 0.315 |
| STAGE II                | 8 (21.6%)   | 12 (21.8%)  | 20 (21.7%)   |       |
| STAGE III               | 3 (8.1%)    | 4 (7.3%)    | 7 (7.6%)     |       |
| STAGE IVA               | 4 (10.8%)   | 16 (29.1%)  | 20 (21.7%)   | 0.325 |
| STAGE IVB               | 6 (16.2%)   | 1 (1.8%)    | 7 (7.6%)     |       |
| STAGE UNKNOWN           | 2 (5.4%)    | 2 (3.6%)    | 4 (4.3%)     |       |
| T.Stage                 |             |             |              |       |
| Missing                 | 4           | 7           | 11           |       |
| T1                      | 17 (42.5%)  | 37 (62.7%)  | 54 (54.5%)   |       |
| T2                      | 0 (0.0%)    | 1 (1.7%)    | 1 (1.0%)     |       |
| T2a                     | 4 (10.0%)   | 3 (5.1%)    | 7 (7.1%)     |       |
| T2b                     | 12 (30.0%)  | 12 (20.3%)  | 24 (24.2%)   |       |
| T2B                     | 1 (2.5%)    | 0 (0.0%)    | 1 (1.0%)     |       |
| T3                      | 5 (12.5%)   | 5 (8.5%)    | 10 (10.1%)   |       |
| TIII                    | 1 (2.5%)    | 0 (0.0%)    | 1 (1.0%)     |       |
| TX                      | 0 (0.0%)    | 1 (1.7%)    | 1 (1.0%)     |       |
| N.Stage                 |             |             |              |       |

|                                  |                |                  |                  |       |
|----------------------------------|----------------|------------------|------------------|-------|
| Missing                          | 4              | 7                | 11               |       |
| N0                               | 29 (72.5%)     | 43 (72.9%)       | 72 (72.7%)       |       |
| N1                               | 6 (15.0%)      | 14 (23.7%)       | 20 (20.2%)       |       |
| No                               | 1 (2.5%)       | 0 (0.0%)         | 1 (1.0%)         |       |
| NX                               | 1 (2.5%)       | 0 (0.0%)         | 1 (1.0%)         |       |
| Unknown                          | 3 (7.5%)       | 2 (3.4%)         | 5 (5.1%)         |       |
| M.Stage                          |                |                  |                  | 0.011 |
| Missing                          | 4              | 7                | 11               |       |
| M0                               | 34 (85.0%)     | 58 (98.3%)       | 92 (92.9%)       |       |
| M1                               | 6 (15.0%)      | 1 (1.7%)         | 7 (7.1%)         |       |
| Surgical.Margins                 |                |                  |                  | 0.960 |
| Missing                          | 16             | 30               | 46               |       |
| Involved by invasive carcinoma   | 3 (10.7%)      | 4 (11.1%)        | 7 (10.9%)        |       |
| Uninvolved by invasive carcinoma | 25 (89.3%)     | 32 (88.9%)       | 57 (89.1%)       |       |
| CEA                              |                |                  |                  | 0.613 |
| Missing                          | 24             | 33               | 57               |       |
| N                                | 20             | 33               | 53               |       |
| Mean (SD)                        | 2.2 (2.0)      | 13.5 (52.9)      | 9.3 (41.9)       |       |
| Median                           | 1.5            | 1.6              | 1.6              |       |
| Range                            | 0.5 - 7.9      | 0.5 - 303.4      | 0.5 - 303.4      |       |
| CA19_9                           |                |                  |                  | 0.734 |
| Missing                          | 8              | 14               | 22               |       |
| N                                | 36             | 52               | 88               |       |
| Mean (SD)                        | 612.6 (2275.4) | 4882.7 (30675.8) | 3135.8 (23625.5) |       |

|                   |               |                |                |       |
|-------------------|---------------|----------------|----------------|-------|
| Median            | 62.5          | 54.5           | 57.5           |       |
| Range             | 1.0 - 13514.0 | 1.0 - 221600.0 | 1.0 - 221600.0 |       |
| Tumor_size_cm_    |               |                |                | 0.645 |
| N                 | 44            | 66             | 110            |       |
| Mean (SD)         | 7.2 (3.5)     | 7.0 (3.9)      | 7.1 (3.7)      |       |
| Median            | 6.9           | 5.8            | 6.4            |       |
| Range             | 2.0 - 20.0    | 0.5 - 20.0     | 0.5 - 20.0     |       |
| Tumor_Grade       |               |                |                | 0.953 |
| Missing           | 0             | 1              | 1              |       |
| N                 | 44            | 65             | 109            |       |
| Mean (SD)         | 2.9 (0.5)     | 2.9 (0.5)      | 2.9 (0.5)      |       |
| Median            | 3.0           | 3.0            | 3.0            |       |
| Range             | 2.0 - 4.0     | 1.0 - 4.0      | 1.0 - 4.0      |       |
| Vascular_invasion |               |                |                | 0.713 |
| Missing           | 2             | 0              | 2              |       |
| N                 | 42            | 66             | 108            |       |
| Mean (SD)         | 0.2 (0.7)     | 0.2 (0.6)      | 0.2 (0.6)      |       |
| Median            | 0.0           | 0.0            | 0.0            |       |
| Range             | 0.0 - 2.0     | 0.0 - 2.0      | 0.0 - 2.0      |       |
| AFP               |               |                |                | 0.583 |
| Missing           | 16            | 18             | 34             |       |
| N                 | 28            | 48             | 76             |       |
| Mean (SD)         | 3.1 (1.9)     | 3.9 (6.6)      | 3.6 (5.3)      |       |
| Median            | 3.0           | 2.6            | 2.7            |       |
| Range             | 0.2 - 8.4     | 0.2 - 45.6     | 0.2 - 45.6     |       |
| TB                |               |                |                | 0.298 |

|           |            |            |            |       |
|-----------|------------|------------|------------|-------|
| Missing   | 2          | 3          | 5          |       |
| N         | 42         | 63         | 105        |       |
| Mean (SD) | 1.1 (2.3)  | 0.8 (1.2)  | 0.9 (1.7)  |       |
| Median    | 0.6        | 0.5        | 0.6        |       |
| Range     | 0.1 - 14.8 | 0.1 - 9.1  | 0.1 - 14.8 |       |
| ALB       |            |            |            | 0.607 |
| Missing   | 11         | 8          | 19         |       |
| N         | 33         | 58         | 91         |       |
| Mean (SD) | 3.6 (1.5)  | 4.1 (0.8)  | 3.9 (1.1)  |       |
| Median    | 4.2        | 4.3        | 4.3        |       |
| Range     | 0.4 - 4.7  | 0.3 - 4.9  | 0.3 - 4.9  |       |
| ALT       |            |            |            | 0.380 |
| Missing   | 14         | 20         | 34         |       |
| N         | 30         | 46         | 76         |       |
| Mean (SD) | 4.5 (3.9)  | 5.4 (7.3)  | 5.1 (6.2)  |       |
| Median    | 3.1        | 3.7        | 3.6        |       |
| Range     | 0.6 - 17.7 | 1.4 - 50.7 | 0.6 - 50.7 |       |
| PT        |            |            |            | 0.448 |
| Missing   | 4          | 2          | 6          |       |
| N         | 40         | 64         | 104        |       |
| Mean (SD) | 10.1 (6.6) | 9.3 (3.6)  | 9.6 (4.9)  |       |
| Median    | 9.6        | 9.6        | 9.6        |       |
| Range     | 0.9 - 46.3 | 0.1 - 24.5 | 0.1 - 46.3 |       |

### TMA score by TNM stage (either as continuous or dichotomized by median values)

|           | Stage I-II (N=76) | Stage III-IV (N=35) | Total (N=111) | p value |
|-----------|-------------------|---------------------|---------------|---------|
| tma.score |                   |                     |               | 0.941   |
| Missing   | 0                 | 1                   | 1             |         |
| N         | 76                | 34                  | 110           |         |
| Mean (SD) | 2.6 (0.6)         | 2.6 (0.5)           | 2.6 (0.5)     |         |
| Median    | 3.0               | 3.0                 | 3.0           |         |
| Range     | 1.0 - 3.0         | 1.5 - 3.0           | 1.0 - 3.0     |         |

  

|              | TMA Score <= 2.5 (N=44) | TMA Score > 2.5 (N=66) | Total (N=110) | p value |
|--------------|-------------------------|------------------------|---------------|---------|
| stage_high   |                         |                        |               | 0.801   |
| Stage I-II   | 31 (70.5%)              | 45 (68.2%)             | 76 (69.1%)    |         |
| Stage III-IV | 13 (29.5%)              | 21 (31.8%)             | 34 (30.9%)    |         |

## Supp. Figure S1

### Overall Survival by TMA Score

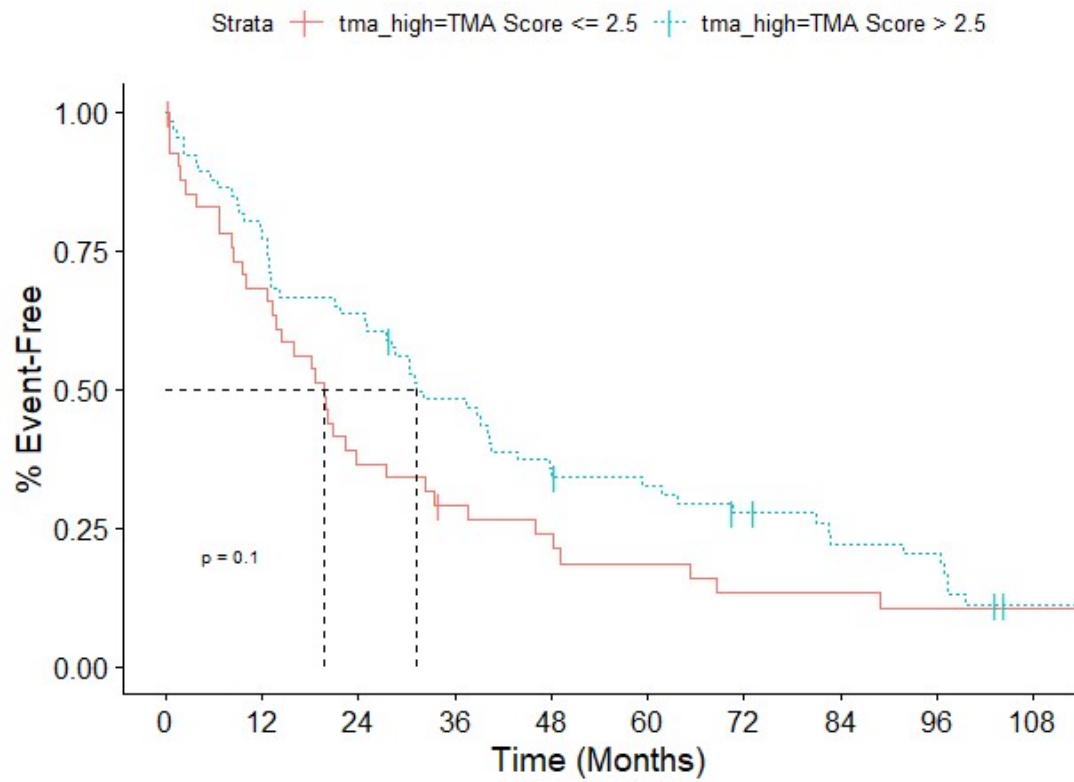

## Supp. Figure S2

### Recurrence-free Survival by TMA Score

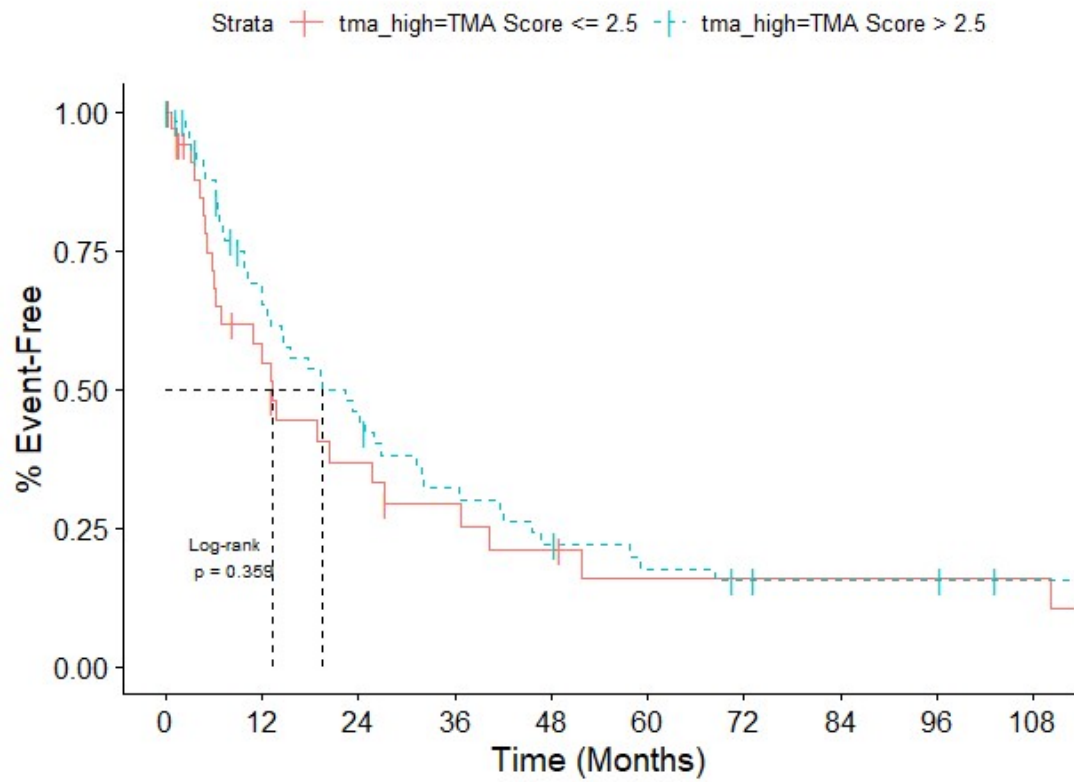



### Supp. Figure S3

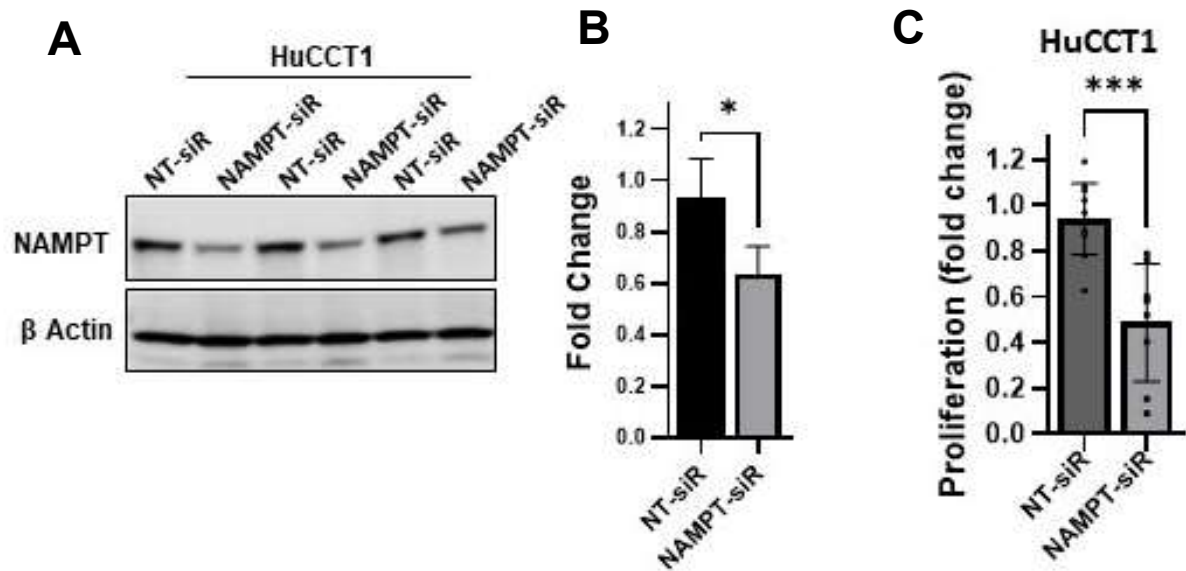

**A**, NAMPT expression was assessed by western blotting in, HuCCT1 cells transfected with NAMPT-siRNA or NT-siRNA. **B**, densitometry analysis. **C**, HuCCT1 cells were transfected with NAMPT-siRNA or NT-siRNA, and cell growth was assessed after 72 hours using MTS assay. (\*  $p < 0.05$ , \*\*\*  $p < 0.001$ )

# Supp. Figure S4

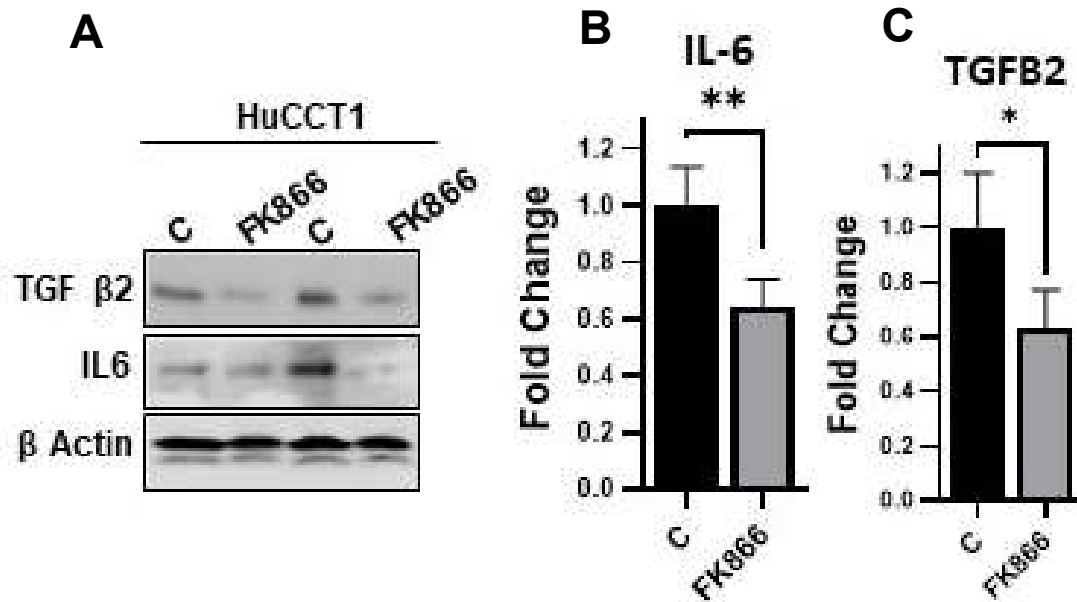

**A, B & C.** TGF b2 and IL6 expression were measured by western blotting in HuCCT1 cells treated with FK866 or vehicle control and densitometry analysis performed. (\*  $p < 0.05$ , \*\*  $p < 0.01$ )
